# Supplementary material for: Performance Analysis of Self-Collected Nasal and Oral Swabs for Detection of SARS-CoV-2
Source: MDPI journal article supplement (doi:10.3390/diagnostics12102279), 2022-09-21
Supplement: s1 [file s1]

## Supplementary Results

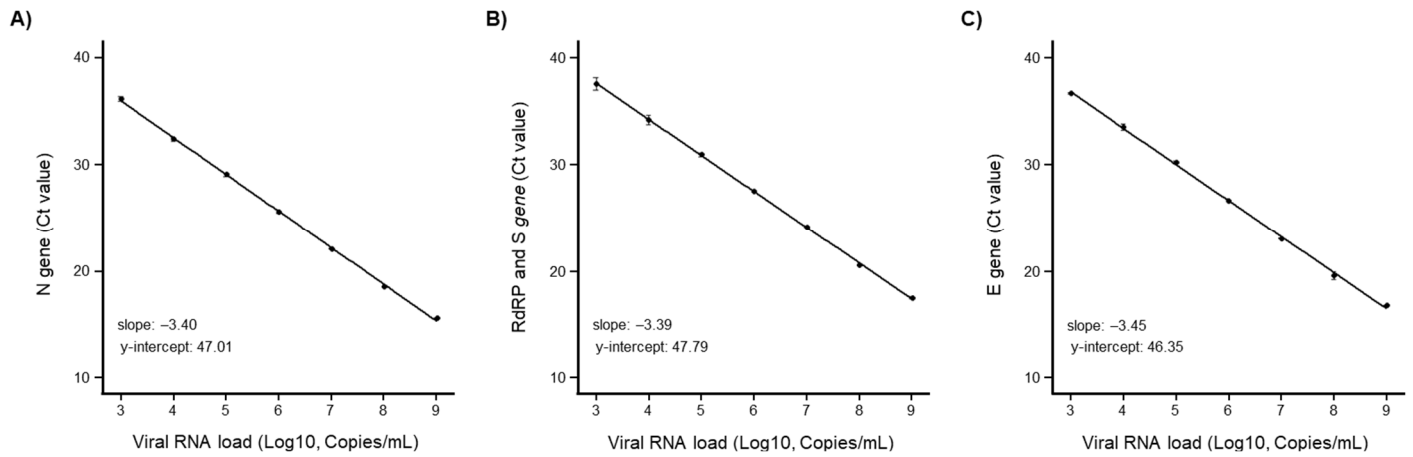

**Supplementary Figure S1. Ten-fold dilutions ranging from  $10^9$  to  $10^3$  copies of SARS-CoV-2 RNA were tested in triplicates using real-time RT-PCR. A standard curve of the (A) *N*, (B) *RdRP* and *S*, and (C) *E* was generated by plotting the Ct values on the y-axis and the log10 of the input on the x-axis.**
